# Supplementary material for: Ranking the environmental factors of indoor air quality of metropolitan independent coffee shops by Random Forests model
Source: Sci Rep. 2022 Sep 26;12:16057. doi: 10.1038/s41598-022-20421-2 (PMC9513105; doi:10.1038/s41598-022-20421-2)
Supplement: Supplementary file 2 — Supplementary Information 2. [file 41598_2022_20421_MOESM2_ESM.csv]

Indoor activity	Ventilation status	Locating on the main traffic street
1=cooking	1=AC on/Window or door open	1=yes
2=roasting beans	2=AC on/Window or door closed	2=no
3=cleaning	3=AC off/Window or door closed
4=smoking
5=others
